# Supplementary material for: Intraspecific chemodiversity provides plant individual- and neighbourhood-mediated associational resistance towards aphids
Source: PubMed Central journal article supplement (PMC10111025; doi:10.3389/fpls.2023.1145918), 2023-04-04
Supplement: DataSheet_1.pdf [file DataSheet_1.pdf]

*Supplementary Material for article*

**Intraspecific Chemodiversity Provides Plant Individual- and Neighbourhood-Mediated Associational Resistance towards Aphids**

Dominik Ziaja, Caroline Müller\*

\* Correspondence: Caroline Müller: [caroline.mueller@uni-bielefeld.de](mailto:caroline.mueller@uni-bielefeld.de)

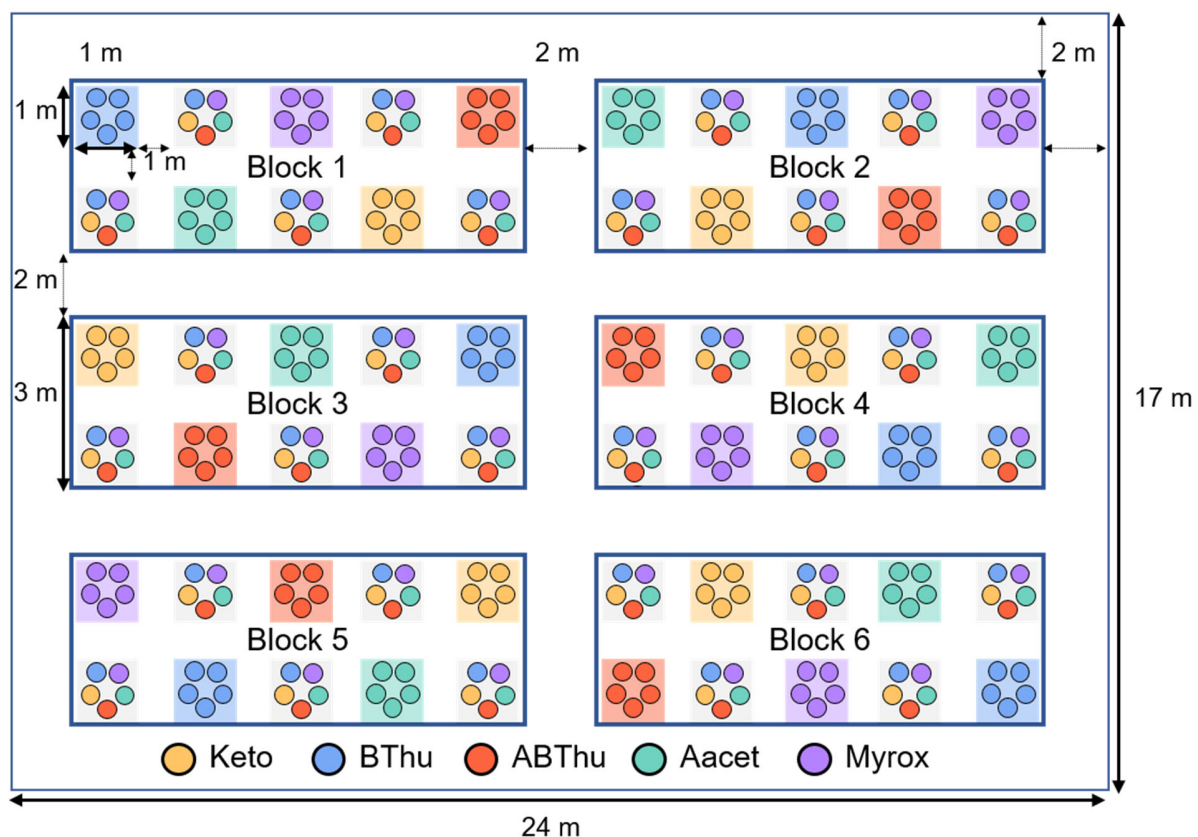

**Supplementary Figure 1.** Experimental common garden design. Plants of five different chemotypes (Keto: artemisia ketone chemotype, BThu:  $\beta$ -thujone chemotype, ABThu:  $\alpha$ -/ $\beta$ -thujone chemotype, Aacet: artemisyl acetate/artemisia ketone/artemisia alcohol chemotype, Myrox: (Z)-myroxide/santolina triene/artemisyl acetate chemotype) were planted in plots with all five individuals sharing the same chemotype (homogenous) or all five individuals expressing a different chemotype (heterogenous). The experimental set-up was replicated in six blocks. Number of plants in total = 300. As one plant in a homogenous plot turned out to be not the correct chemotype, only 295 plants (59 plots) were considered for further analysis.

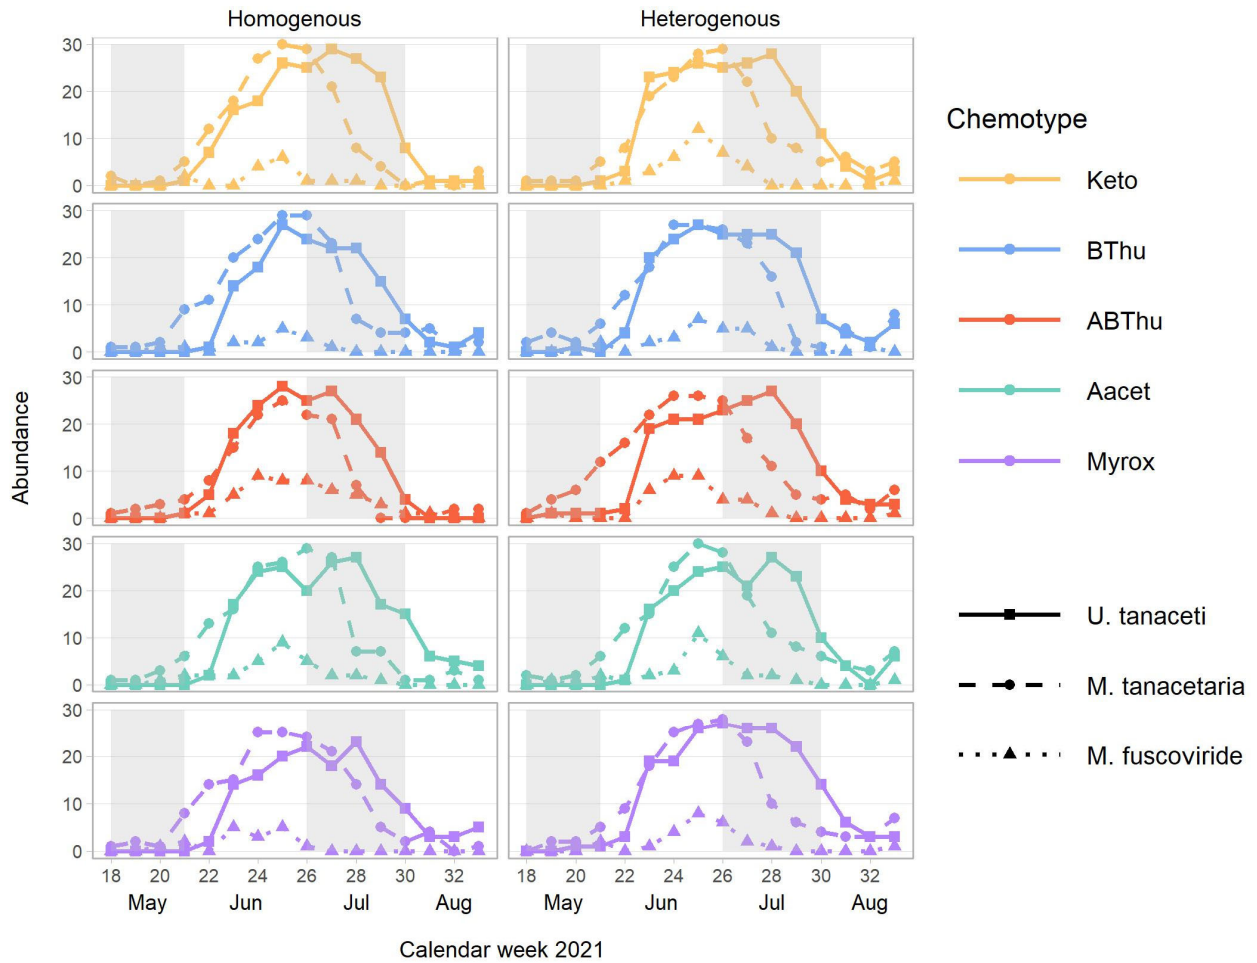

**Supplementary Figure 2.** Abundance (presence on plant) of winged and unwinged aphids of *Uroleucon tanacetii* (■, solid line), *Macrosiphoniella tanacetaria* (●, dashed line) and *Metopeurum fuscoviride* (▲, dotted line) per calendar week on plants of *Tanacetum vulgare* grown in plots of five individuals of the same (homogenous) or different (heterogenous) chemotypes (Keto: artemisia ketone chemotype, BThu:  $\beta$ -thujone chemotype, ABThu:  $\alpha$ -/ $\beta$ -thujone chemotype, Aacet: artemisyl acetate/artemisia ketone/artemisia alcohol chemotype, Myrox: (*Z*)-myroxide/santolina triene/artemisyl acetate chemotype) across the season.  $n = 25$  (plants with Myrox chemotype in homogenous plots) or  $n = 30$  (plants for each of the other combinations of chemotypes and plot-type).

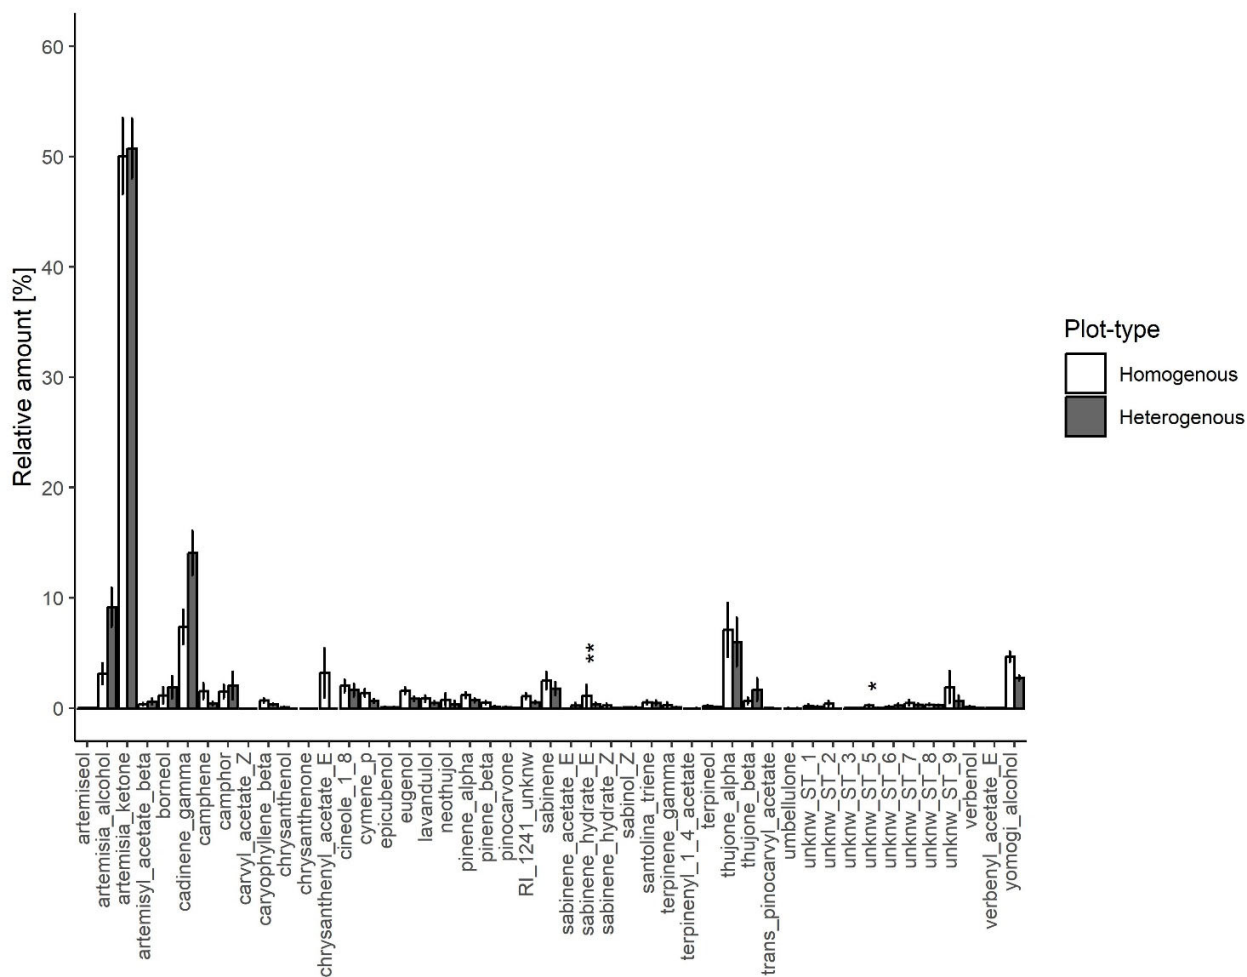

**Supplementary Figure 3.** Relative proportion of compounds in leaf samples of the artemisia ketone chemotype (Keto) from *Tanacetum vulgare* plants grown in plots consisting of five individuals of the same (homogenous) or different (heterogenous) chemotypes. Leaf samples were collected in June 2021. Shown are the mean  $\pm$  standard error across  $n = 30$  plants (heterogenous) or  $n = 29$  (homogenous). Significant differences are based on pairwise Mann-Whitney U tests with Holm-method  $p$ -value correction (\*,  $p < 0.05$ ; \*\*,  $p < 0.01$ ). ST = sesquiterpenoid, unknow = unknown, RI = retention index.

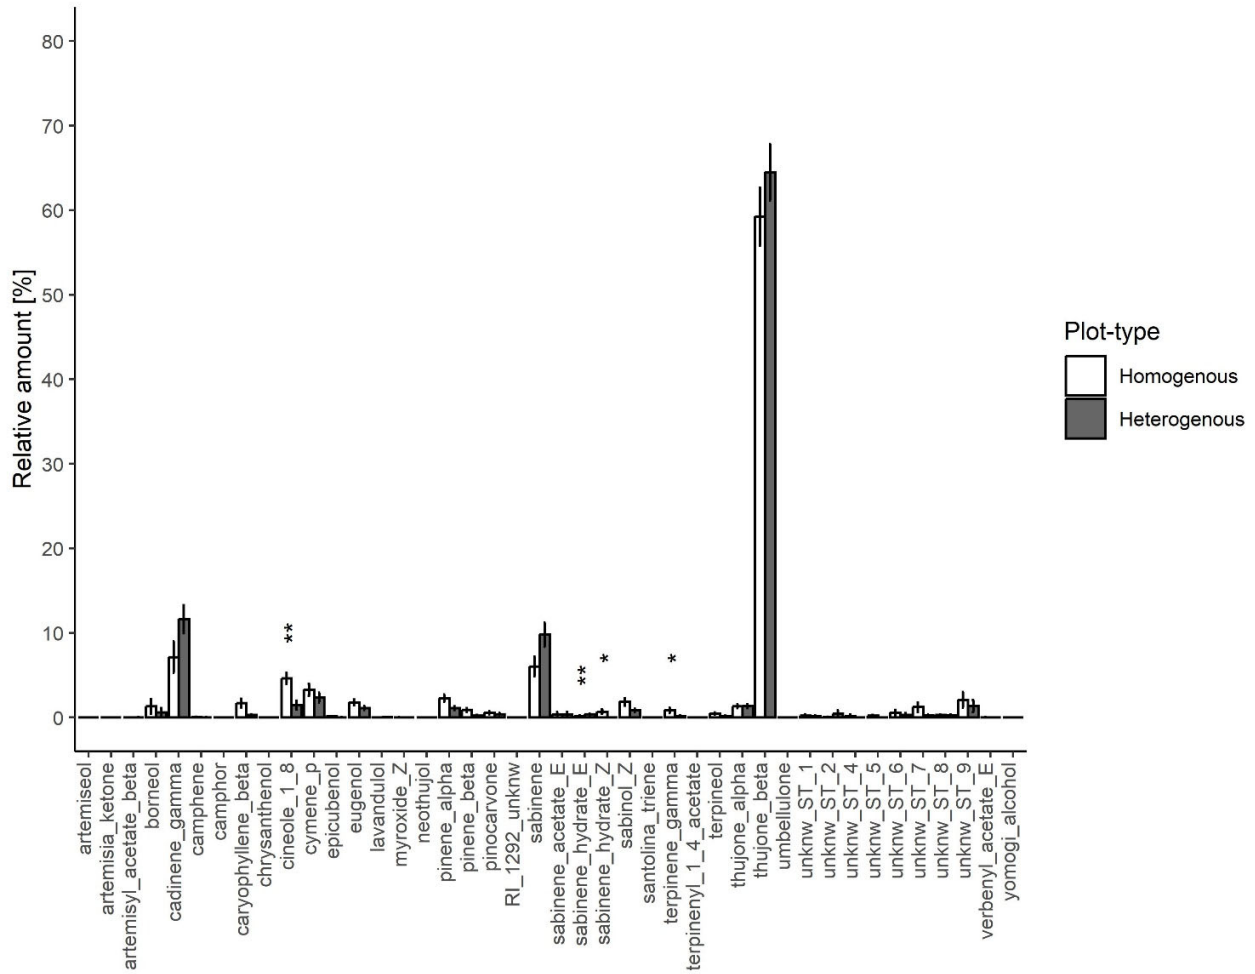

**Supplementary Figure 4.** Relative proportion of compounds in leaf samples of the  $\beta$ -thujone chemotype (BThu) from *Tanacetum vulgare* plants grown in plots consisting of five individuals of the same (homogenous) or different (heterogenous) chemotypes. Leaf samples were collected in June 2021. Shown are the mean  $\pm$  standard error across  $n = 30$  plants. Significant differences are based on pairwise Mann-Whitney U tests with Holm-method  $p$ -value correction (\*,  $p < 0.05$ ; \*\*,  $p < 0.01$ ). ST = sesquiterpenoid, unknw = unknown, RI = retention index.

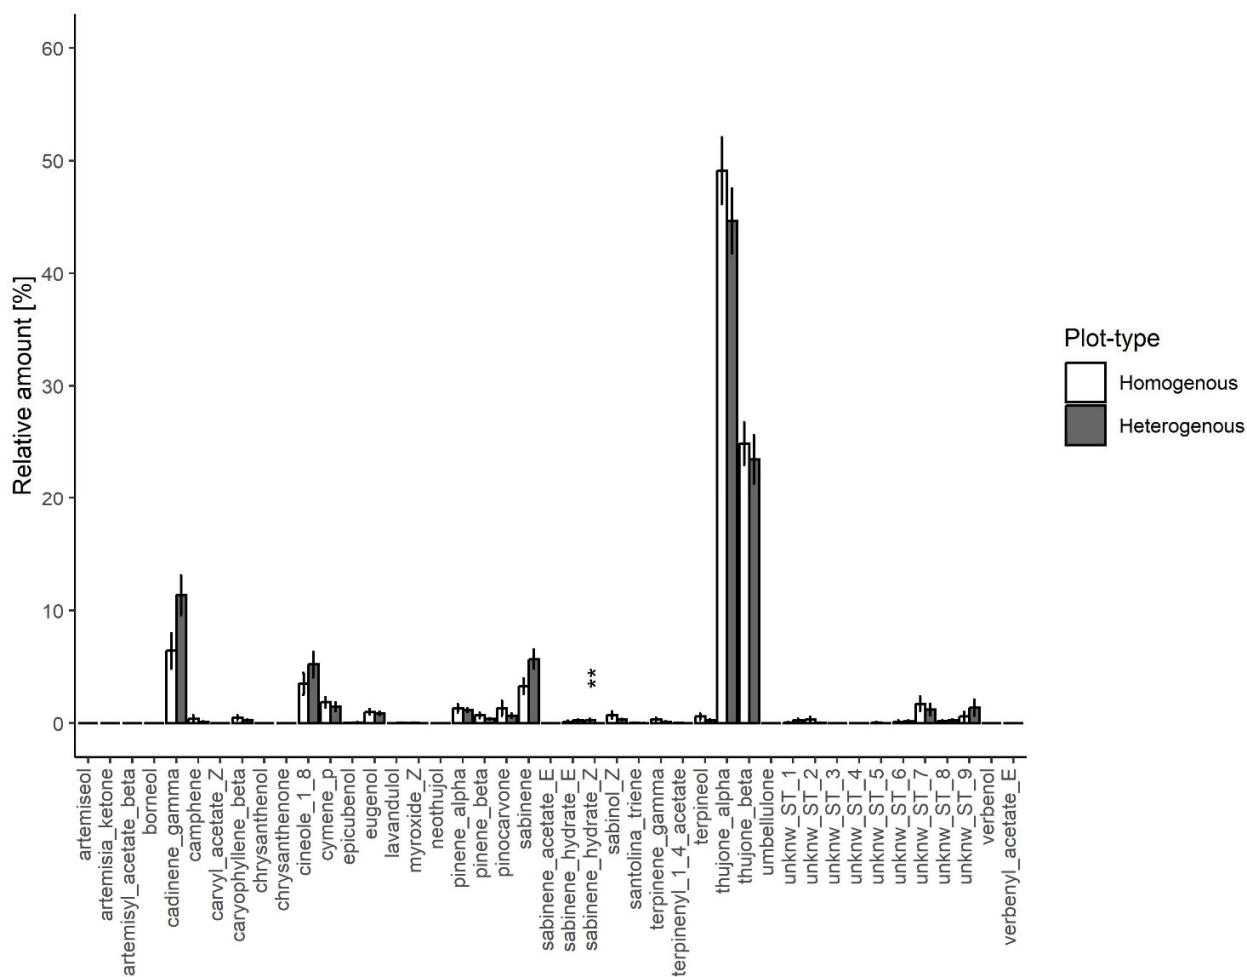

**Supplementary Figure 5.** Relative proportion of compounds in leaf samples of the  $\alpha$ - $\beta$ -thujone chemotype (ABThu) from *Tanacetum vulgare* plants grown in plots consisting of five individuals of the same (homogenous) or different (heterogenous) chemotypes. Leaf samples were collected in June 2021. Shown are the mean  $\pm$  standard error across  $n = 29$  plants. Significant differences are based on pairwise Mann-Whitney U tests with Holm-method  $p$ -value correction (\*\*,  $p < 0.01$ ). ST = sesquiterpenoid, unknow = unknown, RI = retention index.

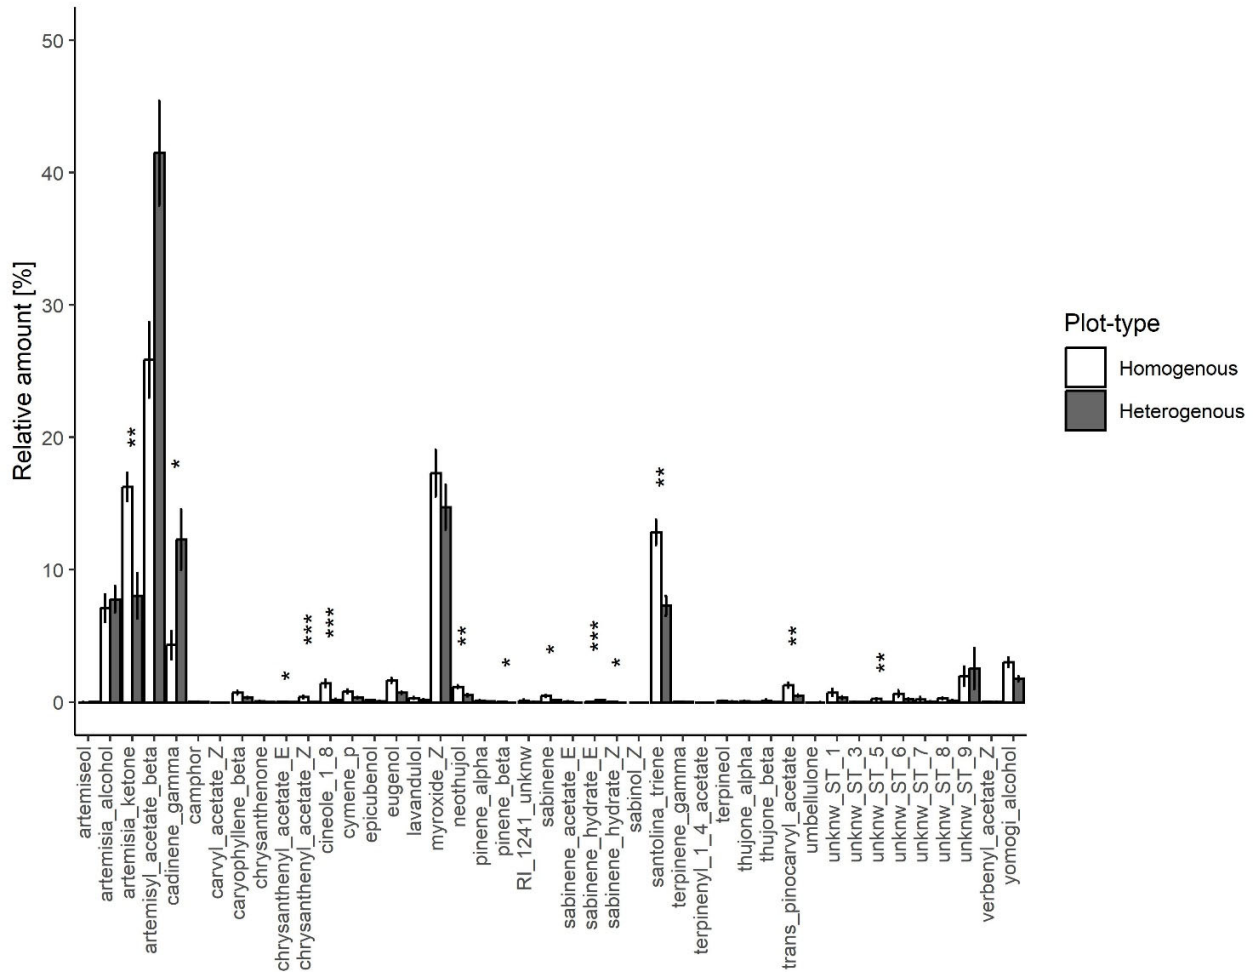

**Supplementary Figure 6.** Relative proportion of compounds in leaf samples of the artemisyl acetate/artemisia ketone/artemisia alcohol chemotype (Acet) from *Tanacetum vulgare* plants grown in plots consisting of five individuals of the same (homogenous) or different (heterogenous) chemotypes. Leaf samples were collected in June 2021. Shown are the mean  $\pm$  standard error across  $n = 30$  plants. Significant differences are based on pairwise Mann-Whitney U tests with Holm-method  $p$ -value correction (\*,  $p < 0.05$ ; \*\*,  $p < 0.01$ ; \*\*\*,  $p < 0.001$ ). ST = sesquiterpenoid, unknw = unknown, RI = retention index.

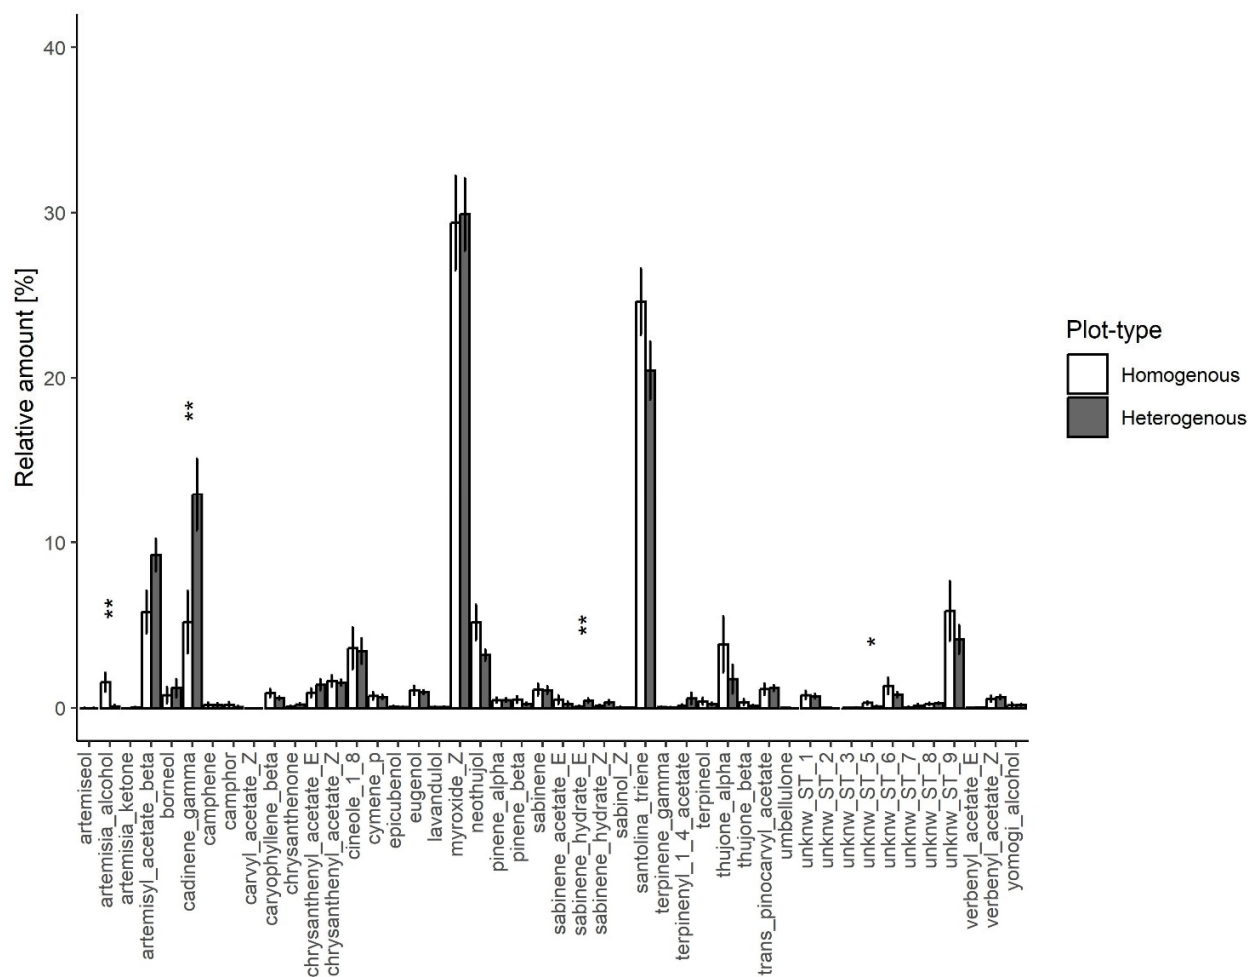

**Supplementary Figure 7.** Relative proportion of compounds in leaf samples of the (Z)-myroxide/santolina triene/artemisyl acetate chemotype (Myrox) from *Tanacetum vulgare* plants grown in plots consisting of five individuals of the same (homogenous) or different (heterogenous) chemotypes. Leaf samples were collected in June 2021. Shown are the mean  $\pm$  standard error across homogenous (n = 25) or heterogenous (n = 30) plots. Significant differences are based on pairwise Mann-Whitney U tests with Holm-method  $p$ -value correction (\*,  $p < 0.05$ ; \*\*,  $p < 0.01$ ). ST = sesquiterpenoid, unknow = unknown, RI = retention index.
